# Supplementary material for: The promotion effect of Sn on Cr/KIT-6 for the catalytic combustion of chlorobenzene
Source: Royal Society of Chemistry journal article supplement (doi:10.1039/d3nj00996c), 2023-01-01
Supplement: d3nj00996c1.pdf [file d3nj00996c1.pdf]

## Supplementary Information

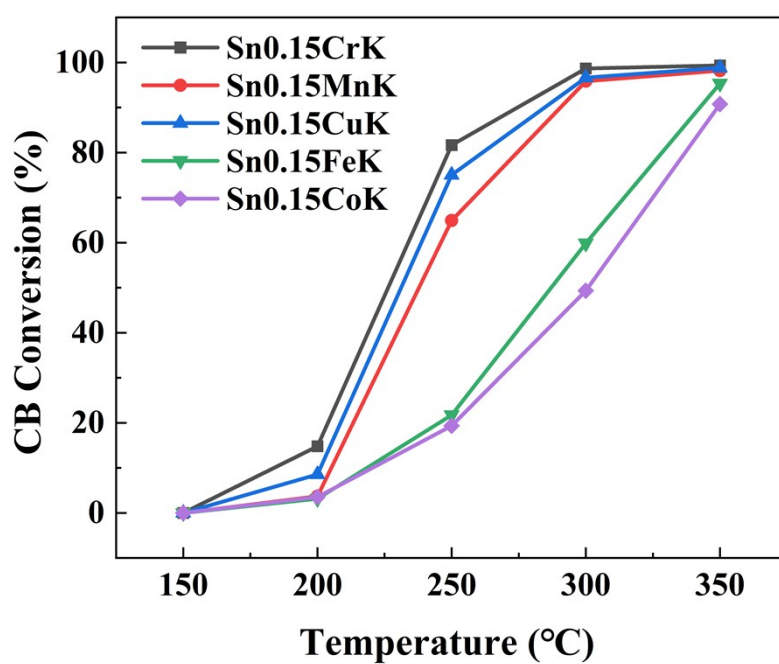

**Fig. S1** The activity of Sn0.15MK catalysts for CB combustion, gas composition: 300 ppm CB, 20% O<sub>2</sub>, balance N<sub>2</sub>; GHSV = 15 000 h<sup>-1</sup>.

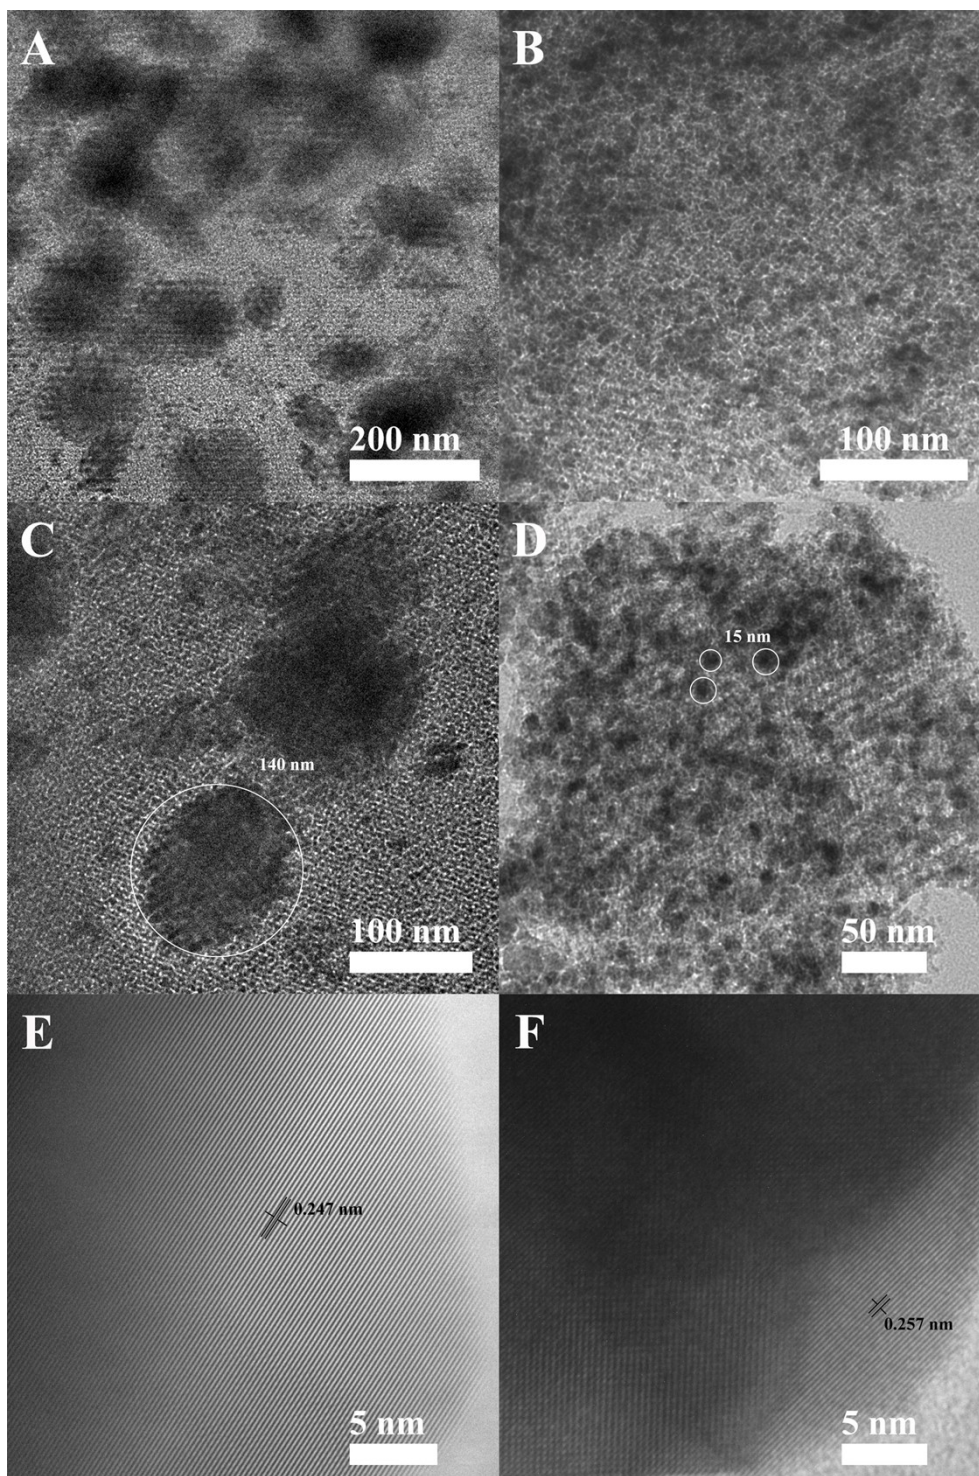

**Fig. S2** TEM (A-D) and HRTEM (E, F) images of: (A, C and E) CrK and (B, D and F) Sn<sub>0.15</sub>CrK.

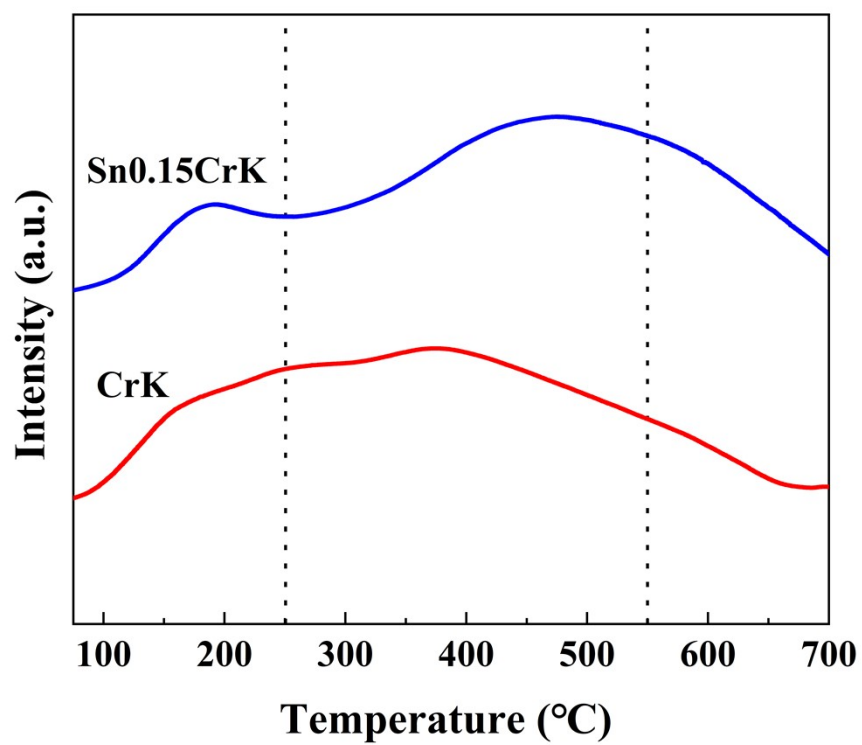

**Fig. S3** O<sub>2</sub>-TPD patterns of CrK and Sn0.15CrK.

Table S1 Comparison of different catalysts on the activity of CB.

| Catalysts                  | CB concentration       | GHSV                   | T50/°C | T90/°C | References |
|----------------------------|------------------------|------------------------|--------|--------|------------|
| 2wt% Pd/Al-PILC            | 0.01%                  | 22 000 h <sup>-1</sup> | 367    | -      | 26         |
| 2wt% Pt/Al-PILC            | 0.01%                  | 22 000 h <sup>-1</sup> | 321    | -      | 26         |
| 0.2wt% Pd/TiO <sub>2</sub> | 2500 mg/m <sup>2</sup> | 30 000 h <sup>-1</sup> | 280    | 370    | 27         |
| 30wt% CuCeO <sub>4</sub>   | 500 ppm                | 30 000 h <sup>-1</sup> | 259    | 300    | 28         |
| 10wt% MnCo (3:1) /MCM-41   | 1000 ppm               | 20 000 h <sup>-1</sup> | 236    | 280    | 10         |
| 10 wt% Cr/AlZr-PILC        | 1000 ppm               | 20 000 h <sup>-1</sup> | 300    | 370    | 29         |
| Sn0.15CrK                  | 300 ppm                | 15 000 h <sup>-1</sup> | 225    | 274    | This work  |
| CrK                        | 300 ppm                | 15 000 h <sup>-1</sup> | 257    | -      | This work  |
